# Supplementary material for: Tailoring thermoresponsive nanostructured poly(N-isopropylacrylamide) hydrogels made with poly(acrylamide) nanoparticles
Source: Springer Nature journal article supplement (doi:10.1007/s00396-013-2918-9), 2013-02-09
Supplement: MOESM1 [file 10946262]

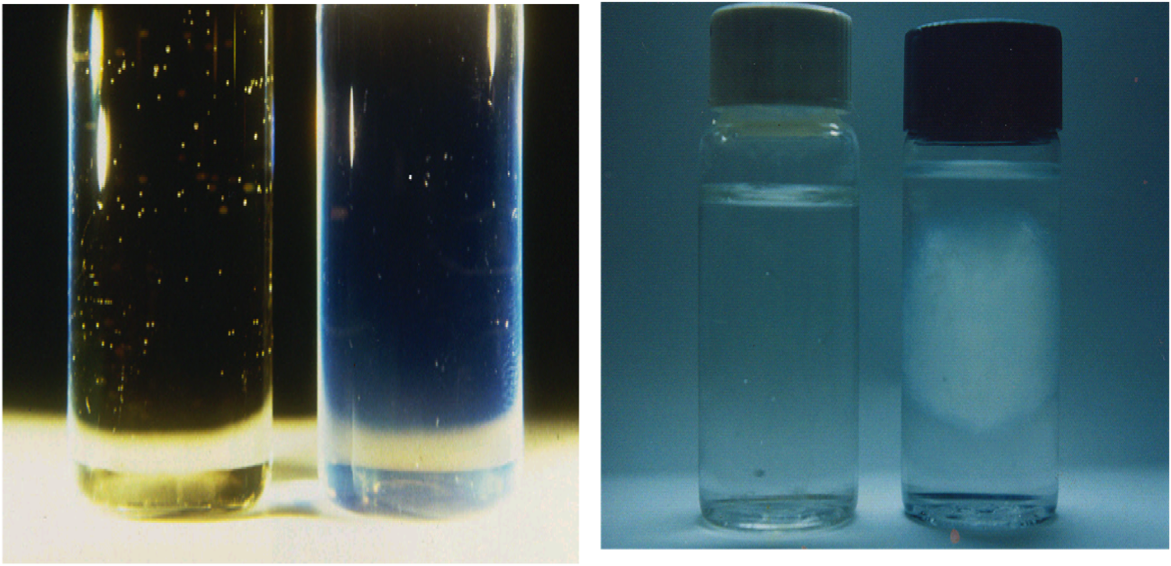


**Fig. SM1** Photograph at ×100 magnification of the conventional and nanostructured hydrogels immersed in water

**FIGURE SM1**

**FERNANDEZ et al.**

**Colloid Polym Sci (2013)**
